# Supplementary material for: Cost-Effectiveness of Glucosamine in Osteoarthritis Treatment: A Systematic Review
Source: MDPI journal article supplement (doi:10.3390/healthcare11162340), 2023-08-18
Supplement: s1 [file s1]

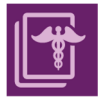

Table S1. Quality assessment of selected reports based on QHES Instrument

1

| Question                                                                                                                                                                                          | Bruyère et al.,<br>2019 | Scholtissen et<br>al., 2010 | Segal et al.,<br>2004 | Black et<br>al., 2009 | Bruyère et al.,<br>2021 | Luksameesate et<br>al., 2022 | Bruyère et al.,<br>2023 |
|---------------------------------------------------------------------------------------------------------------------------------------------------------------------------------------------------|-------------------------|-----------------------------|-----------------------|-----------------------|-------------------------|------------------------------|-------------------------|
| Was the study objective in a clear, specific, and measurable manner?                                                                                                                              | Yes                     | Yes                         | Yes                   | Yes                   | Yes                     | Yes                          | Yes                     |
| Were the perspective of the analysis (societal, third-party payer, etc.) and reasons for its selection stated?                                                                                    | No                      | No                          | No                    | No                    | No                      | Yes                          | No                      |
| Were variable estimates used in the analysis from the best available source (i.e., randomized control trial - best, expert opinion - worst)?                                                      | Yes                     | Yes                         | Yes                   | Yes                   | Yes                     | Yes                          | Yes                     |
| If estimates came from a subgroup analysis, were the groups prespecified at the beginning of the study?                                                                                           | No                      | No                          | No                    | No                    | No                      | No                           | No                      |
| Was uncertainty handled by (1) statistical analysis to address random events, (2) sensitivity analysis to cover a range of assumptions?                                                           | Yes                     | Yes                         | Yes                   | Yes                   | Yes                     | Yes                          | Yes                     |
| Was incremental analysis performed between alternatives for resources and costs?                                                                                                                  | Yes                     | Yes                         | Yes                   | Yes                   | Yes                     | Yes                          | Yes                     |
| Was the methodology for data abstraction (including the value of health states and other benefits) stated?                                                                                        | Yes                     | Yes                         | Yes                   | Yes                   | Yes                     | Yes                          | Yes                     |
| Did the analytic horizon allow time for all relevant and important outcomes? Were benefits and costs that went beyond 1 year discounted (3% to 5%) and justification given for the discount rate? | No                      | No                          | Yes                   | Yes                   | No                      | No                           | No                      |
| Was the measurement of costs appropriate and the methodology for the estimation of quantities and unit costs clearly described?                                                                   | Yes                     | Yes                         | Yes                   | Yes                   | Yes                     | Yes                          | Yes                     |

|                                                                                                                                                                                         |      |      |      |      |      |      |      |
|-----------------------------------------------------------------------------------------------------------------------------------------------------------------------------------------|------|------|------|------|------|------|------|
| Were the primary outcome measure(s) for the economic evaluation clearly stated and did they include the major short-term was justification given for the measures/scales used?          | Yes  |
| Were the health outcomes measures/scales valid and reliable? If previously tested valid and reliable measures were not available, was justification given for the measures/scales used? | Yes  |
| Were the economic model (including structure), study methods and analysis, and the components of the numerator and denominator displayed in a clear, transparent manner?                | Yes  |
| Were the choice of economic model, main assumptions, and limitations of the study stated and justified?                                                                                 | Yes  |
| Did the author(s) explicitly discuss direction and magnitude of potential biases?                                                                                                       | Yes  |
| Were the conclusions/recommendations of the study justified and based on the study results?                                                                                             | Yes  |
| Was there a statement disclosing the source of funding for the study?                                                                                                                   | Yes  |
| <b>TOTAL</b>                                                                                                                                                                            | 88   | 88   | 95   | 95   | 88   | 92   | 88   |
| <b>QUALITY</b>                                                                                                                                                                          | High |
